# Supplementary material for: Extended-range forecasting of stream water temperature with deep-learning models
Source: Copernicus journal article supplement (doi:10.5194/hess-29-1685-2025), 2025-03-26
Supplement: Supplementary file 1 [file hess-29-1685-2025-supplement.pdf]

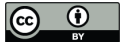

*Supplement of*

## **Extended-range forecasting of stream water temperature with deep-learning models**

**Ryan S. Padrón et al.**

*Correspondence to:* Ryan S. Padrón ([ryan.padron@wsl.ch](mailto:ryan.padron@wsl.ch))

The copyright of individual parts of the supplement might differ from the article licence.

10 **Table S1:** List of 54 stream water temperature stations from the Swiss Federal Office for the Environment monitoring network (<https://www.hydrodaten.admin.ch/en/>) with their corresponding characteristics used as static features when training the deep learning models. \*Indicates the subset of 20 stations not used for training the models when evaluating the predictive skill at new and ungauged stations. For each of these stations a corresponding similar station is indicated in parentheses whose data are used to normalize water temperature when evaluating the predictive skill at ungauged stations.

| Station ID   | Name                                  | Area [km <sup>2</sup> ] | Mean elevation [m asl] | Glacierized fraction [%] | Coord X [m] | Coord Y [m] | Station elevation [m asl] | Water temp mean [°C] | Water temp stdev [°C] |
|--------------|---------------------------------------|-------------------------|------------------------|--------------------------|-------------|-------------|---------------------------|----------------------|-----------------------|
| 2009         | Rhône - Porte du Scex                 | 5238                    | 2127                   | 11.1                     | 557660      | 133280      | 377                       | 8.36                 | 2.42                  |
| 2016         | Aare - Brugg                          | 11681                   | 1000                   | 1.5                      | 657000      | 259360      | 332                       | 13.31                | 5.76                  |
| 2018* (2016) | Reuss - Mellingen                     | 3386                    | 1259                   | 1.8                      | 662830      | 252580      | 345                       | 13.41                | 6.01                  |
| 2019         | Aare - Brienzwiler                    | 555                     | 2135                   | 15.5                     | 649930      | 177380      | 570                       | 7.72                 | 2.21                  |
| 2029         | Aare - Brügg, Aegerten                | 8249                    | 1142                   | 2.1                      | 588220      | 219020      | 428                       | 13.12                | 5.91                  |
| 2030         | Aare - Thun                           | 2459                    | 1746                   | 6.9                      | 613230      | 179280      | 548                       | 12.39                | 4.90                  |
| 2034         | Broye - Payerne, Caserne d'aviation   | 416                     | 715                    | 0                        | 561660      | 187320      | 441                       | 13.01                | 6.87                  |
| 2044         | Thur - Andelfingen                    | 1702                    | 770                    | 0                        | 693510      | 272500      | 356                       | 12.98                | 6.46                  |
| 2056* (2276) | Reuss - Seedorf                       | 833                     | 2013                   | 6.4                      | 690085      | 193210      | 438                       | 8.35                 | 3.15                  |
| 2068         | Ticino - Riazzino                     | 1613                    | 1643                   | 0.1                      | 713670      | 113500      | 200                       | 10.95                | 4.20                  |
| 2070* (2343) | Emme - Emmenmatt, nur Hauptstation    | 443                     | 1065                   | 0                        | 623610      | 200430      | 638                       | 10.81                | 5.39                  |
| 2084         | Muota - Ingenbohl                     | 317                     | 1363                   | 0                        | 688262      | 206170      | 438                       | 9.32                 | 3.48                  |
| 2085* (2029) | Aare - Hagneck                        | 5112                    | 1368                   | 3.4                      | 580680      | 211650      | 437                       | 13.18                | 5.21                  |
| 2091         | Rhein - Rheinfelden, Messstation      | 34524                   | 1068                   | 0.8                      | 627189      | 267845      | 265                       | 13.54                | 5.91                  |
| 2104         | Linth - Weesen, Biäsche               | 1062                    | 1584                   | 1.6                      | 725160      | 221380      | 419                       | 12.08                | 5.14                  |
| 2106         | Birs - Münchenstein, Hofmatt          | 887                     | 728                    | 0                        | 613570      | 263080      | 268                       | 12.28                | 4.97                  |
| 2109* (2019) | Lütschine - Gsteig                    | 381                     | 2050                   | 13.5                     | 633130      | 168200      | 585                       | 7.81                 | 2.80                  |
| 2112         | Sitter - Appenzell                    | 74.4                    | 1256                   | 0.1                      | 749040      | 244220      | 769                       | 9.72                 | 5.13                  |
| 2113* (2091) | Aare - Felsenau, K.W. Klingnau (U.W.) | 17687                   | 1060                   | 1.4                      | 659150      | 271790      | 312                       | 14.14                | 5.90                  |
| 2126         | Murg - Wängi                          | 80.2                    | 652                    | 0                        | 714105      | 261720      | 466                       | 12.50                | 4.85                  |
| 2135         | Aare - Bern, Schönau                  | 2941                    | 1596                   | 5.8                      | 600710      | 198000      | 502                       | 12.62                | 5.04                  |
| 2150* (2276) | Landquart - Felsenbach                | 614                     | 1797                   | 0.7                      | 765364      | 204910      | 571                       | 8.55                 | 4.26                  |
| 2152         | Reuss - Luzern, Geissmattbrücke       | 2254                    | 1504                   | 2.8                      | 665330      | 211800      | 432                       | 13.34                | 5.84                  |
| 2159* (2126) | Gürbe - Belp, Mülimatt                | 116                     | 846                    | 0                        | 604810      | 192680      | 522                       | 12.82                | 5.84                  |
| 2167         | Tresa - Ponte Tresa, Rocchetta        | 609                     | 803                    | 0                        | 709580      | 92145       | 268                       | 16.13                | 7.10                  |

|              |                                                    |       |      |      |        |        |      |       |      |
|--------------|----------------------------------------------------|-------|------|------|--------|--------|------|-------|------|
| 2179         | Sense - Thörishaus,<br>Sense matt                  | 351   | 1071 | 0    | 593350 | 193020 | 553  | 11.62 | 6.39 |
| 2210* (2179) | Doubs - Ocourt                                     | 1275  | 952  | 0    | 572530 | 244460 | 417  | 11.90 | 5.39 |
| 2243         | Limmat - Baden,<br>Limmatpromenade                 | 2384  | 1131 | 0.7  | 665640 | 258690 | 351  | 13.83 | 6.51 |
| 2256* (2269) | Rosegbach -<br>Pontresina                          | 66.5  | 2704 | 21.7 | 788795 | 151694 | 1766 | 5.89  | 4.23 |
| 2269         | Lonza - Blatten                                    | 77.4  | 2624 | 24.7 | 629130 | 140910 | 1520 | 5.87  | 2.72 |
| 2276         | Grosstalbach -<br>Isenthal                         | 43.9  | 1819 | 6.7  | 685500 | 196050 | 767  | 8.51  | 2.09 |
| 2288         | Rhein - Neuhausen,<br>Flurlingerbrücke             | 11930 | 1239 | 0.6  | 689145 | 281975 | 383  | 13.29 | 6.53 |
| 2307* (2414) | Suze - Sonceboz                                    | 127   | 1036 | 0    | 579810 | 227350 | 642  | 10.03 | 2.79 |
| 2308         | Goldach - Goldach,<br>Bleiche, nur<br>Hauptstation | 50.4  | 832  | 0    | 753190 | 261600 | 399  | 11.89 | 7.01 |
| 2343         | Langeten - Huttwil,<br>Häberensbad                 | 59.9  | 760  | 0    | 629560 | 219135 | 597  | 10.81 | 4.06 |
| 2351* (2617) | Vispa - Visp                                       | 786   | 2648 | 23.1 | 634030 | 125900 | 659  | 7.54  | 2.86 |
| 2369         | Mentue - Yvonand,<br>La Mauguettaz                 | 105   | 675  | 0    | 545440 | 180875 | 449  | 11.41 | 5.98 |
| 2374* (2343) | Necker - Mogelsberg,<br>Aachsäge                   | 88.1  | 956  | 0    | 727110 | 247290 | 606  | 10.92 | 6.25 |
| 2392         | Rhein (Oberwasser) -<br>Rheinau                    | 11950 | 1238 | 0.6  | 687420 | 277140 | 353  | 13.28 | 6.49 |
| 2414         | Rietholzbach -<br>Mosnang, Rietholz                | 3.19  | 794  | 0    | 718840 | 248440 | 682  | 9.77  | 4.62 |
| 2415         | Glatt - Rheinsfelden                               | 417   | 503  | 0    | 678040 | 269720 | 336  | 14.25 | 5.94 |
| 2432         | Venoge - Ecublens,<br>Les Bois                     | 228   | 686  | 0    | 532040 | 154160 | 383  | 12.37 | 5.18 |
| 2433* (2493) | Aubonne - Allaman,<br>Le Coulet                    | 105   | 952  | 0    | 520720 | 147410 | 390  | 10.39 | 4.17 |
| 2457* (2369) | Aare - Ringgenberg,<br>Goldswil                    | 1138  | 1951 | 12.1 | 633730 | 171510 | 564  | 11.53 | 4.58 |
| 2462* (2617) | Inn - S-Chanf                                      | 616   | 2463 | 6.1  | 795800 | 165910 | 1645 | 7.09  | 4.26 |
| 2467         | Saane - Gümmenen                                   | 1881  | 1131 | 0.1  | 585100 | 199240 | 473  | 11.61 | 5.35 |
| 2473* (2112) | Rhein - Diepoldsau,<br>Rietbrücke                  | 6299  | 1771 | 0.7  | 766280 | 250360 | 410  | 9.49  | 3.91 |
| 2485* (2432) | Allaine - Boncourt,<br>Frontière                   | 212   | 562  | 0    | 567830 | 261200 | 366  | 12.82 | 4.22 |
| 2493         | Promenthouse -<br>Gland, Route Suisse              | 120   | 1027 | 0    | 510080 | 140080 | 394  | 10.93 | 3.70 |
| 2604* (2112) | Biber - Biberbrugg                                 | 31.9  | 1003 | 0    | 697240 | 223280 | 825  | 9.88  | 6.14 |
| 2608* (2369) | Sellenbodenbach -<br>Neuenkirch                    | 10.4  | 608  | 0    | 658530 | 218290 | 515  | 11.75 | 5.51 |
| 2612         | Riale di Pincascia -<br>Lavertezzo                 | 44.5  | 1705 | 0    | 708060 | 123950 | 536  | 8.98  | 5.78 |
| 2617         | Rom - Müstair                                      | 128   | 2184 | 0    | 830800 | 168700 | 1236 | 7.50  | 3.37 |
| 2623         | Rhone - Oberwald                                   | 93.3  | 2466 | 19.3 | 669870 | 154080 | 1368 | 5.25  | 2.42 |

**Table S2:** Hyperparameters of the deep learning models, the explored hyperparameter space, and their tuned values. Hyperparameter names agree with the PyTorch Forecasting documentation (<https://pytorch-forecasting.readthedocs.io/en/stable/models.html>).

| Model | Hyperparameter         | Tunning space | Tuned value |
|-------|------------------------|---------------|-------------|
| RNNED | hidden_size            | 32 – 128      | 116         |
|       | rnn_layers             | 1 – 4         | 1           |
|       | gradient_clip_val      | 0.1 – 0.3     | 0.144       |
|       | dropout                | 0 – 0.3       | 0.276       |
| TFT   | hidden_size            | 32 – 128      | 60          |
|       | hidden_continuous_size | 8 – 32        | 12          |
|       | lstm_layers            | 1 – 4         | 2           |
|       | attention_head_size    | 1 – 4         | 1           |
|       | gradient_clip_val      | 0.1 – 0.3     | 0.204       |
|       | learning_rate          | 0.001 – 0.1   | 0.0033      |
|       | dropout                | 0 – 0.3       | 0.222       |
| NHITS | hidden_size            | 32 – 128      | 51          |
|       | num_blocks             | 1 – 3         | 3           |
|       | num_stacks             | 1 – 3         | 3           |
|       | gradient_clip_val      | 0.1 – 0.3     | 0.105       |
|       | learning_rate          | 0.001 – 0.1   | 0.0033      |
|       | dropout                | 0 – 0.3       | 0.173       |

35 **Table S3:** Hyperparameter influence on the prediction skill of the RF and MLP models (ARX has no hyperparameters). The analysed RF  
hyperparameters are: num.trees (number of trees), mtry (number of variables to possibly split at in each node), and min.node.size (minimal  
node size to split at). The analysed MLP hyperparameters are: n.hidden (number of hidden nodes), iter.max (maximum iterations of the  
optimization algorithm), and n.trials (number of repeated trials used to avoid local minima). The prediction skill is evaluated as the average  
CRPS over the 32 lead times, 54 stations, and 90 forecasts distributed over the year 2022. Overall, there is little variability of the CRPS for  
40 the different hyperparameter settings, so the default option (in bold) is used throughout the manuscript. \*Here we use only 25 members  
instead of the 51 members of the ensemble forecasts to reduce computing time, which is why the RF has a slightly different CRPS value  
than that reported in Fig. 4.

| Model | Hyperparameters                                | Average CRPS*                                        |
|-------|------------------------------------------------|------------------------------------------------------|
| RF    | <b>500 trees, 2 mtry, 5 minimum node size</b>  | 0.810                                                |
|       | 100 trees, 2 mtry, 5 minimum node size         | 0.811                                                |
|       | 1000 trees, 2 mtry, 5 minimum node size        | 0.809                                                |
|       | 500 trees, 1 mtry, 5 minimum node size         | 0.840                                                |
|       | 500 trees, 5 mtry, 5 minimum node size         | 0.807                                                |
|       | 500 trees, 2 mtry, 2 minimum node size         | 0.809                                                |
|       | 500 trees, 2 mtry, 10 minimum node size        | 0.811                                                |
|       | MLP                                            | <b>2 hidden nodes, 5000 max iterations, 5 trials</b> |
|       | 5 hidden nodes, 5000 max iterations, 5 trials  | 0.788                                                |
|       | 10 hidden nodes, 5000 max iterations, 5 trials | 0.790                                                |
|       | 2 hidden nodes, 1000 max iterations, 5 trials  | 0.804                                                |
|       | 2 hidden nodes, 10000 max iterations, 5 trials | 0.800                                                |
|       | 2 hidden nodes, 5000 max iterations, 1 trials  | 0.805                                                |
|       | 2 hidden nodes, 5000 max iterations, 10 trials | 0.805                                                |

45 **Table S4:** List of start dates of the 90 forecasts during 2022 that are used for model evaluation. Forecasts are generated twice per week, with data missing for 2022-06-30, 2022-07-04, 2022-09-08, 2022-09-12, and 2022-10-03. For each of these 32-day forecasts the modelled water temperature at each station is compared against observations.

| Number | Forecast start date | Number | Forecast start date | Number | Forecast start date |
|--------|---------------------|--------|---------------------|--------|---------------------|
| 1      | 2022-01-03          | 31     | 2022-04-18          | 61     | 2022-08-08          |
| 2      | 2022-01-06          | 32     | 2022-04-21          | 62     | 2022-08-11          |
| 3      | 2022-01-10          | 33     | 2022-04-25          | 63     | 2022-08-15          |
| 4      | 2022-01-13          | 34     | 2022-04-28          | 64     | 2022-08-18          |
| 5      | 2022-01-17          | 35     | 2022-05-02          | 65     | 2022-08-22          |
| 6      | 2022-01-20          | 36     | 2022-05-05          | 66     | 2022-08-25          |
| 7      | 2022-01-24          | 37     | 2022-05-09          | 67     | 2022-08-29          |
| 8      | 2022-01-27          | 38     | 2022-05-12          | 68     | 2022-09-01          |
| 9      | 2022-01-31          | 39     | 2022-05-16          | 69     | 2022-09-05          |
| 10     | 2022-02-03          | 40     | 2022-05-19          | 70     | 2022-09-15          |
| 11     | 2022-02-07          | 41     | 2022-05-23          | 71     | 2022-09-19          |
| 12     | 2022-02-10          | 42     | 2022-05-26          | 72     | 2022-09-22          |
| 13     | 2022-02-14          | 43     | 2022-05-30          | 73     | 2022-09-26          |
| 14     | 2022-02-17          | 44     | 2022-06-02          | 74     | 2022-09-29          |
| 15     | 2022-02-21          | 45     | 2022-06-06          | 75     | 2022-10-06          |
| 16     | 2022-02-24          | 46     | 2022-06-09          | 76     | 2022-10-10          |
| 17     | 2022-02-28          | 47     | 2022-06-13          | 77     | 2022-10-13          |
| 18     | 2022-03-03          | 48     | 2022-06-16          | 78     | 2022-10-17          |
| 19     | 2022-03-07          | 49     | 2022-06-20          | 79     | 2022-10-20          |
| 20     | 2022-03-10          | 50     | 2022-06-23          | 80     | 2022-10-24          |
| 21     | 2022-03-14          | 51     | 2022-06-27          | 81     | 2022-10-27          |
| 22     | 2022-03-17          | 52     | 2022-07-07          | 82     | 2022-10-31          |
| 23     | 2022-03-21          | 53     | 2022-07-11          | 83     | 2022-11-03          |
| 24     | 2022-03-24          | 54     | 2022-07-14          | 84     | 2022-11-07          |
| 25     | 2022-03-28          | 55     | 2022-07-18          | 85     | 2022-11-10          |
| 26     | 2022-03-31          | 56     | 2022-07-21          | 86     | 2022-11-14          |
| 27     | 2022-04-04          | 57     | 2022-07-25          | 87     | 2022-11-17          |
| 28     | 2022-04-07          | 58     | 2022-07-28          | 88     | 2022-11-21          |
| 29     | 2022-04-11          | 59     | 2022-08-01          | 89     | 2022-11-24          |
| 30     | 2022-04-14          | 60     | 2022-08-04          | 90     | 2022-11-28          |

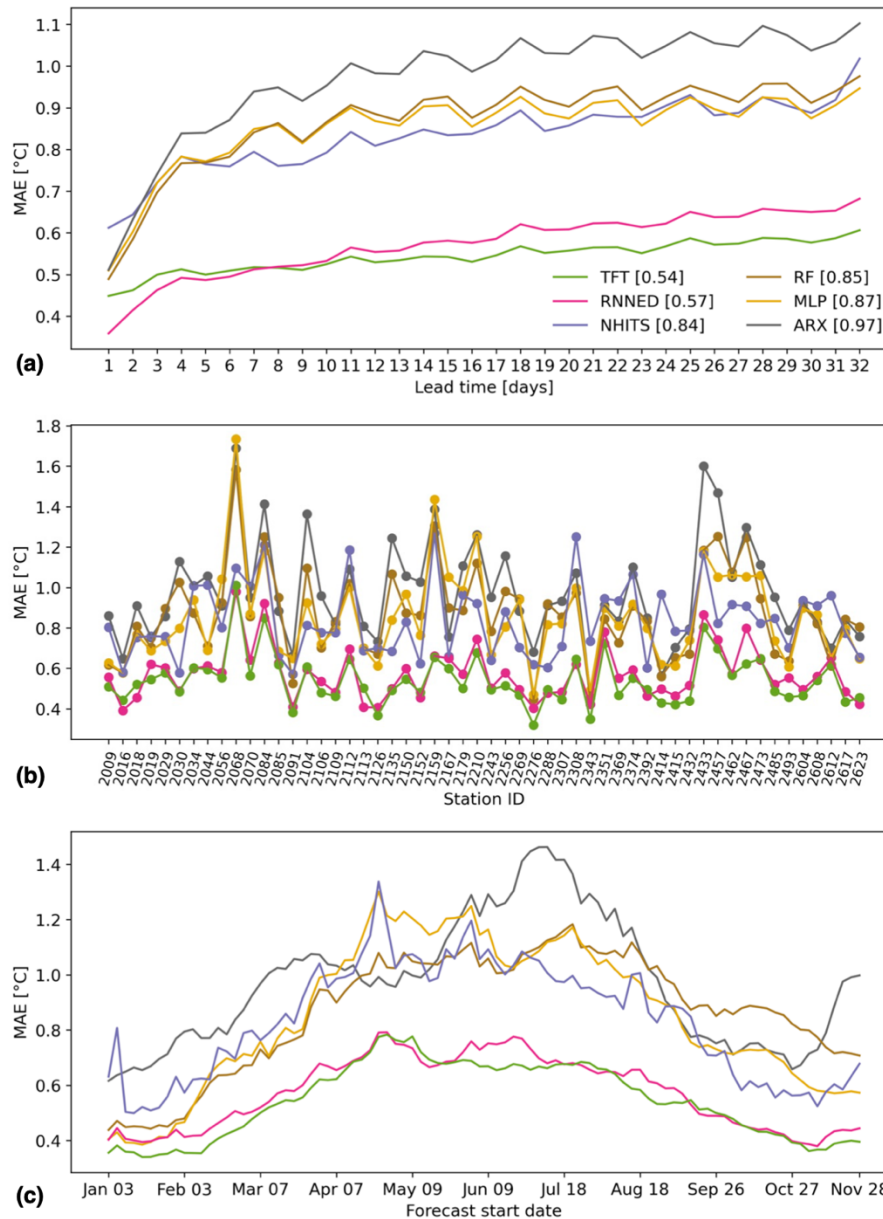

**Figure S1:** Model comparison of predictive skill when omitting the uncertainty of meteorological forecasts. The mean absolute error (MAE) of each model is shown as a function of **(a)** lead time averaged over all stations and forecasts, **(b)** station averaged over all lead times and forecasts, and **(c)** forecast start date averaged over all lead times and stations. The legend indicates the different models and their average MAE over all 32 lead times, 54 stations, and 90 forecasts distributed over the year 2022.

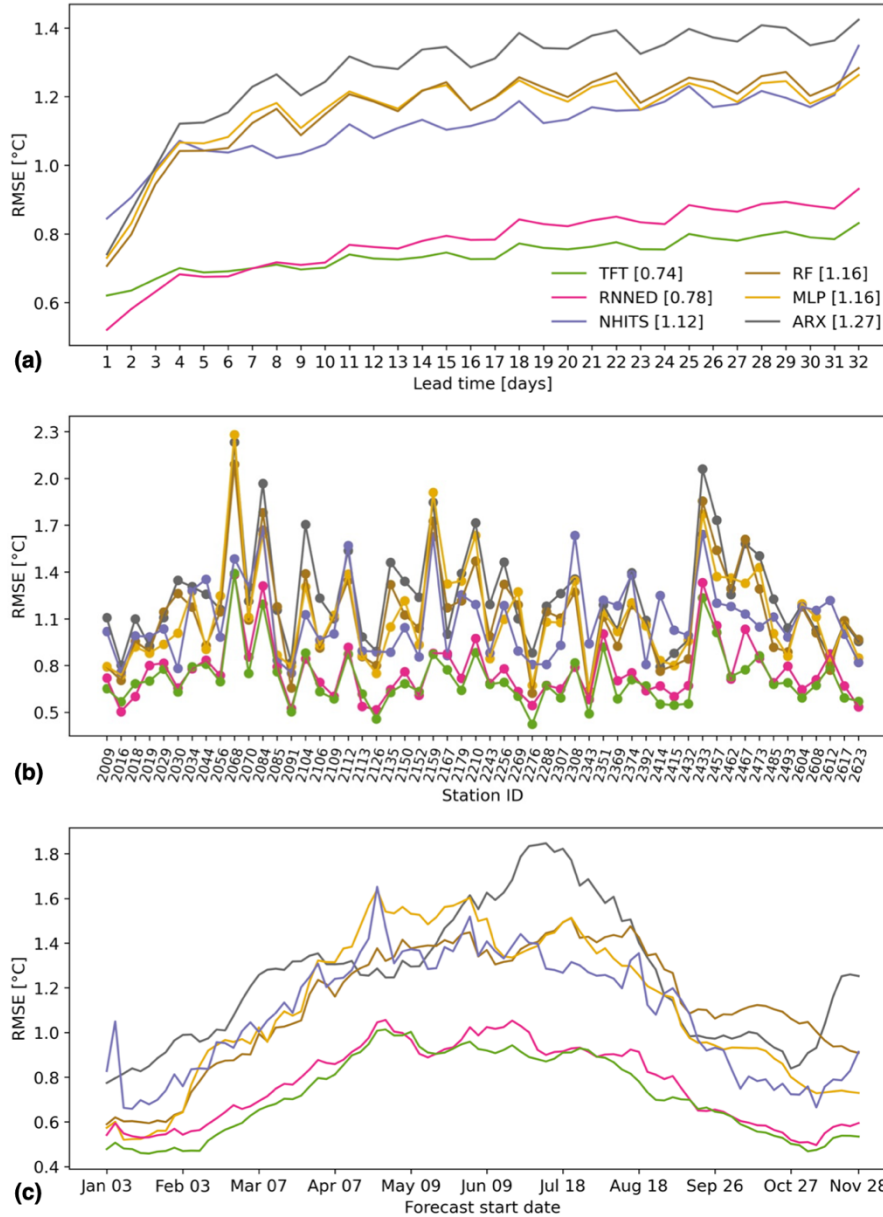

**Figure S2:** Model comparison of predictive skill when omitting the uncertainty of meteorological forecasts. The root mean squared error (RMSE) of each model is shown as a function of **(a)** lead time averaged over all stations and forecasts, **(b)** station averaged over all lead times and forecasts, and **(c)** forecast start date averaged over all lead times and stations. The legend indicates the different models and their average RMSE over all 32 lead times, 54 stations, and 90 forecasts distributed over the year 2022.



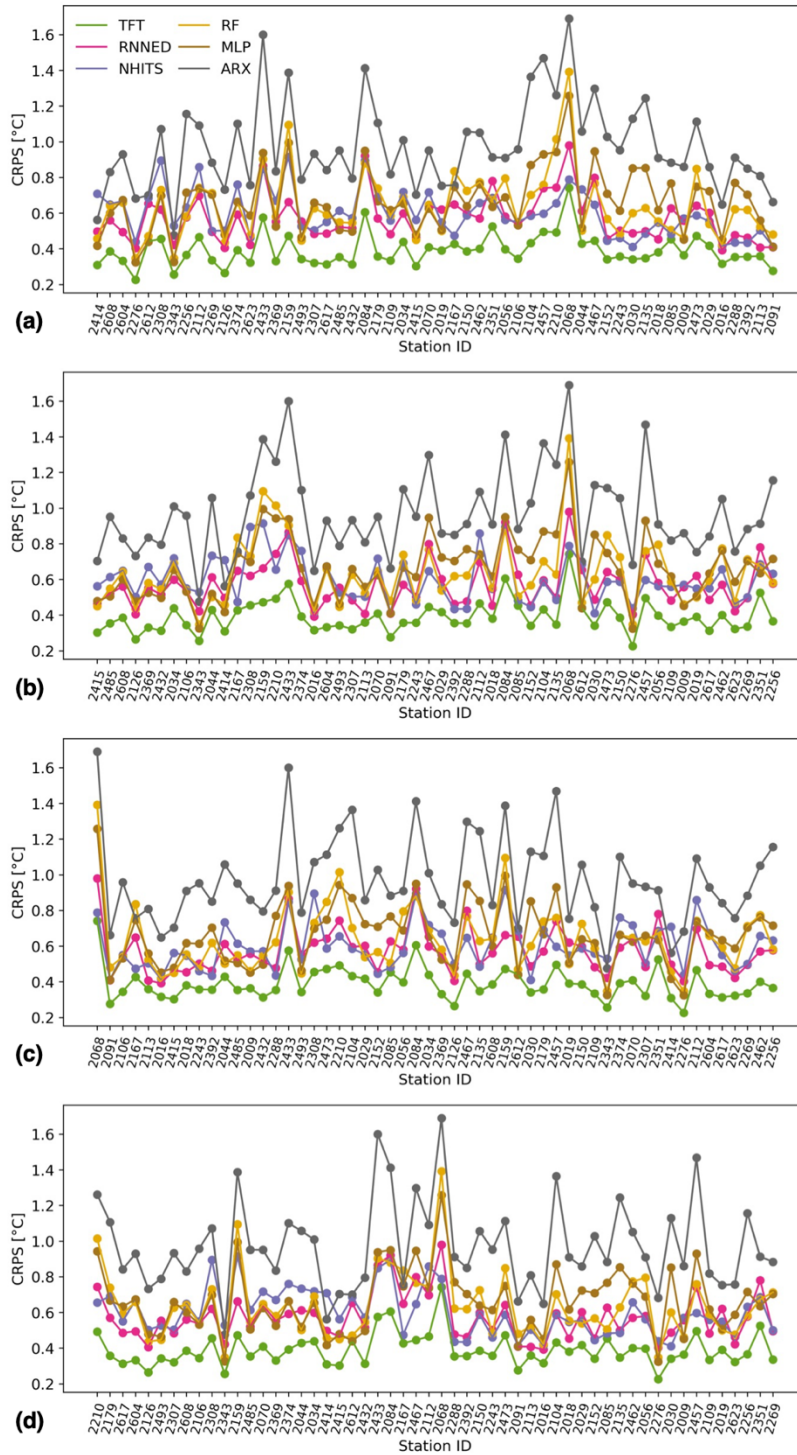

**Figure S3:** Model predictive skill per station when omitting the uncertainty of meteorological forecasts. Stations are sorted in ascending fashion according to **(a)** catchment area, **(b)** mean catchment elevation, **(c)** station elevation, and **(d)** glacierized fraction when omitting the uncertainty of meteorological forecasts. The CRPS is averaged over all lead times and forecasts.

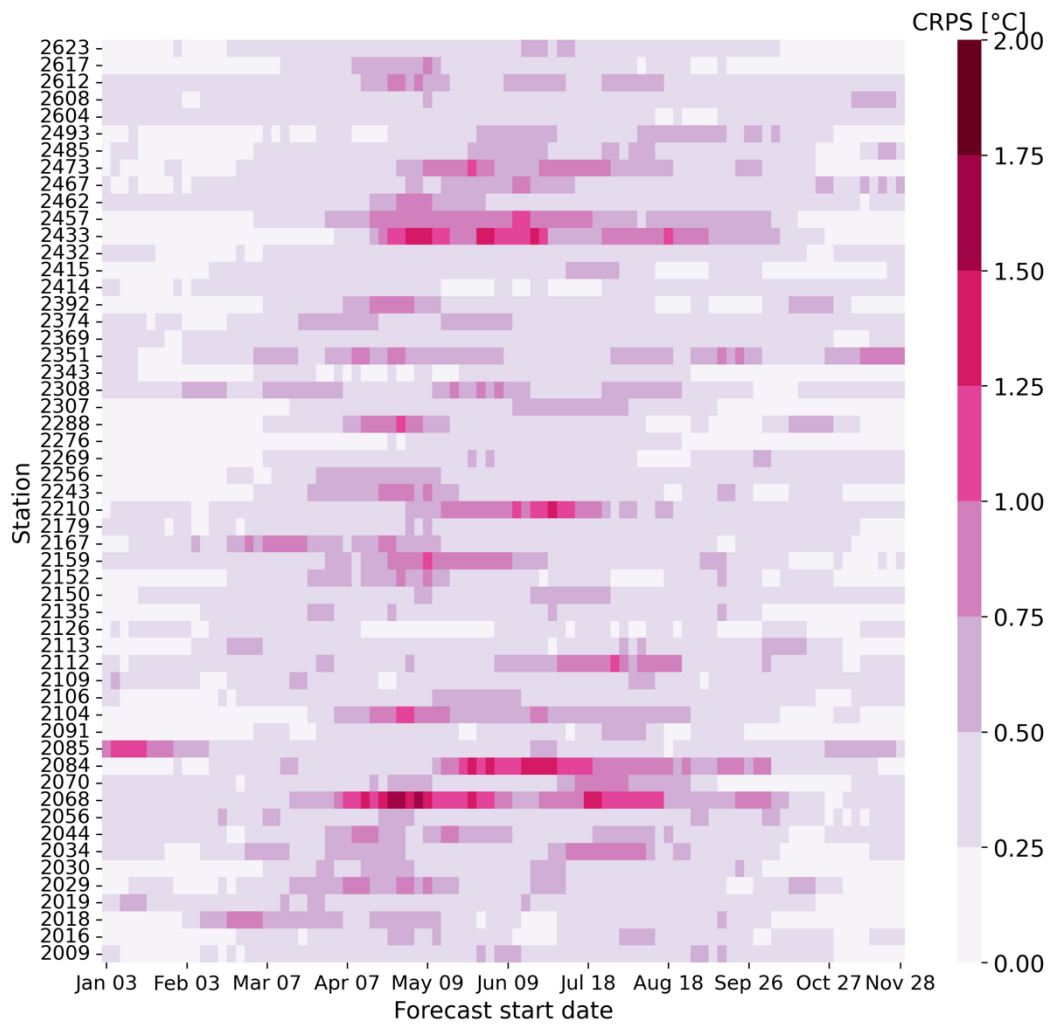

**Figure S4:** TFT predictive skill per forecast start date and station when omitting the uncertainty of meteorological forecasts. The CRPS is averaged over all lead times.

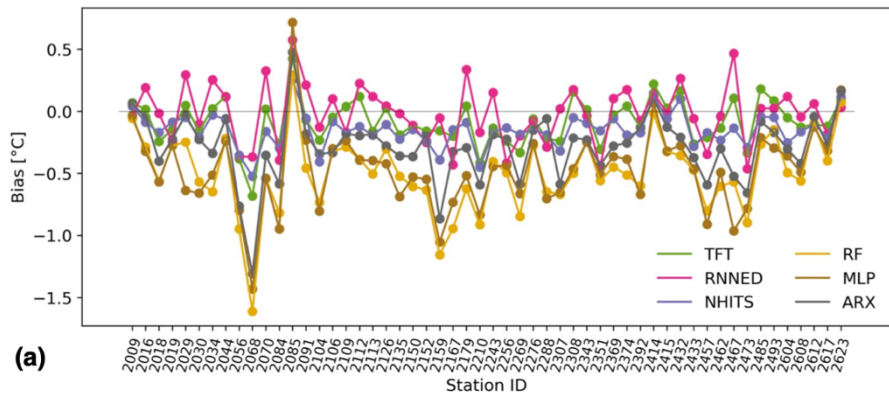

(a)

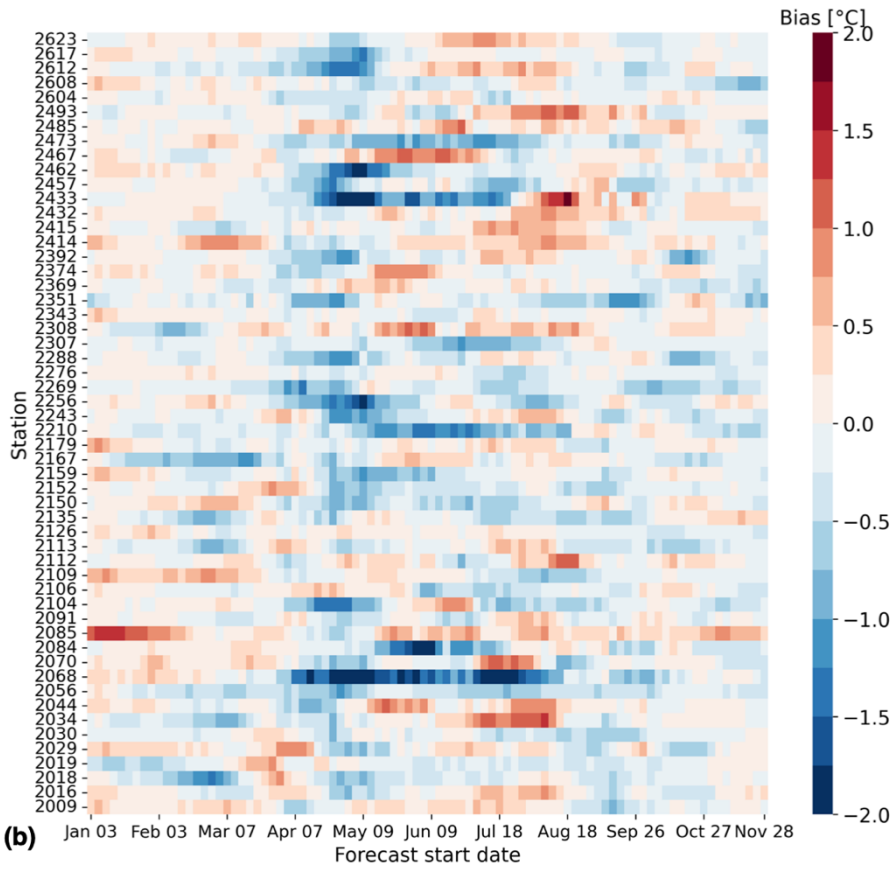

(b)

**Figure S5:** Water temperature forecast bias when omitting the uncertainty of meteorological forecasts. (a) Model comparison of forecast bias as a function of station averaged over all lead times and forecast start dates. (b) TFT forecast bias per forecast start date and station averaged over all lead times.

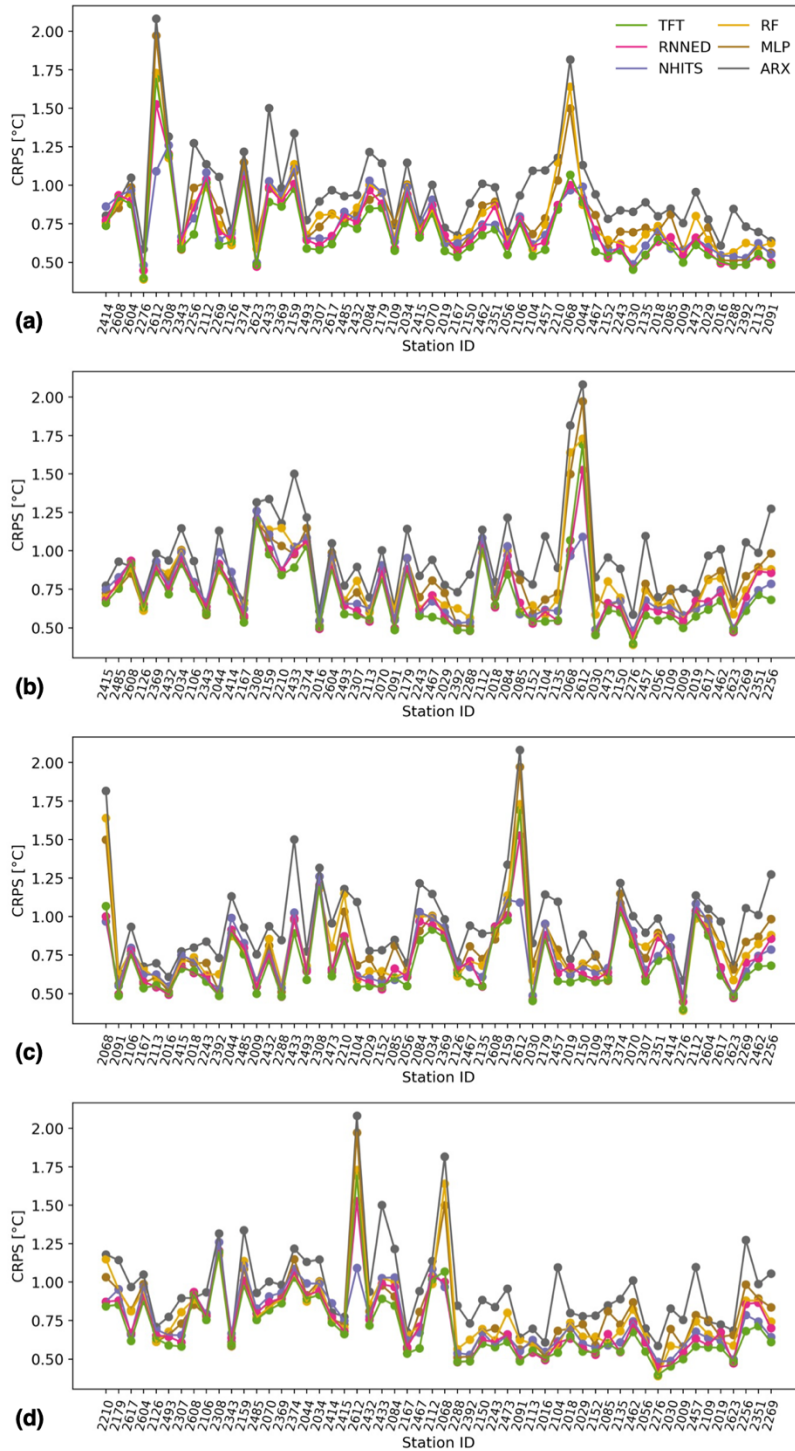

**Figure S6:** Model predictive skill per station when including the uncertainty of meteorological forecasts. Stations are sorted in ascending fashion according to **(a)** catchment area, **(b)** mean catchment elevation, **(c)** station elevation, and **(d)** glacierized fraction when omitting the uncertainty of meteorological forecasts. The CRPS is averaged over all lead times and forecasts.

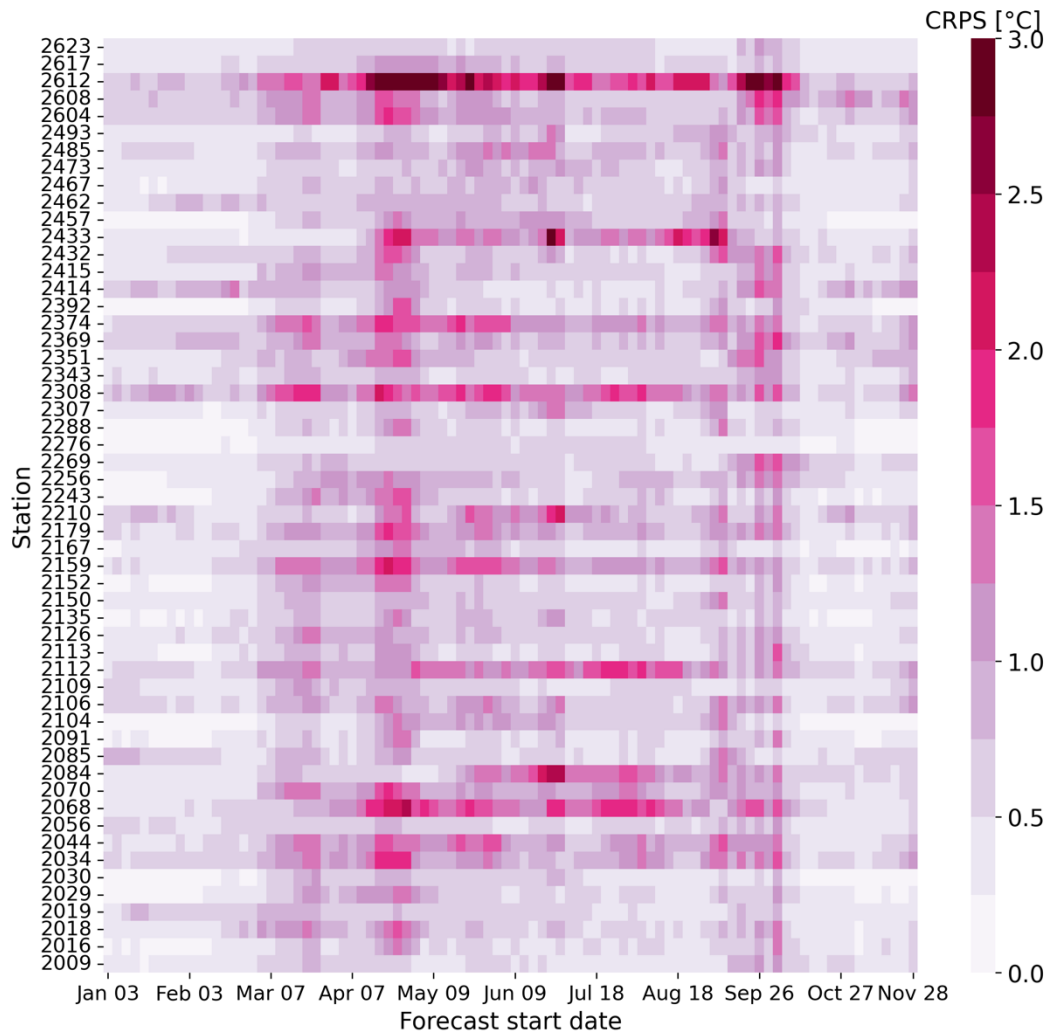

95 **Figure S7:** TFT predictive skill per forecast start date and station when including the uncertainty of meteorological forecasts. The CRPS is averaged over all lead times.

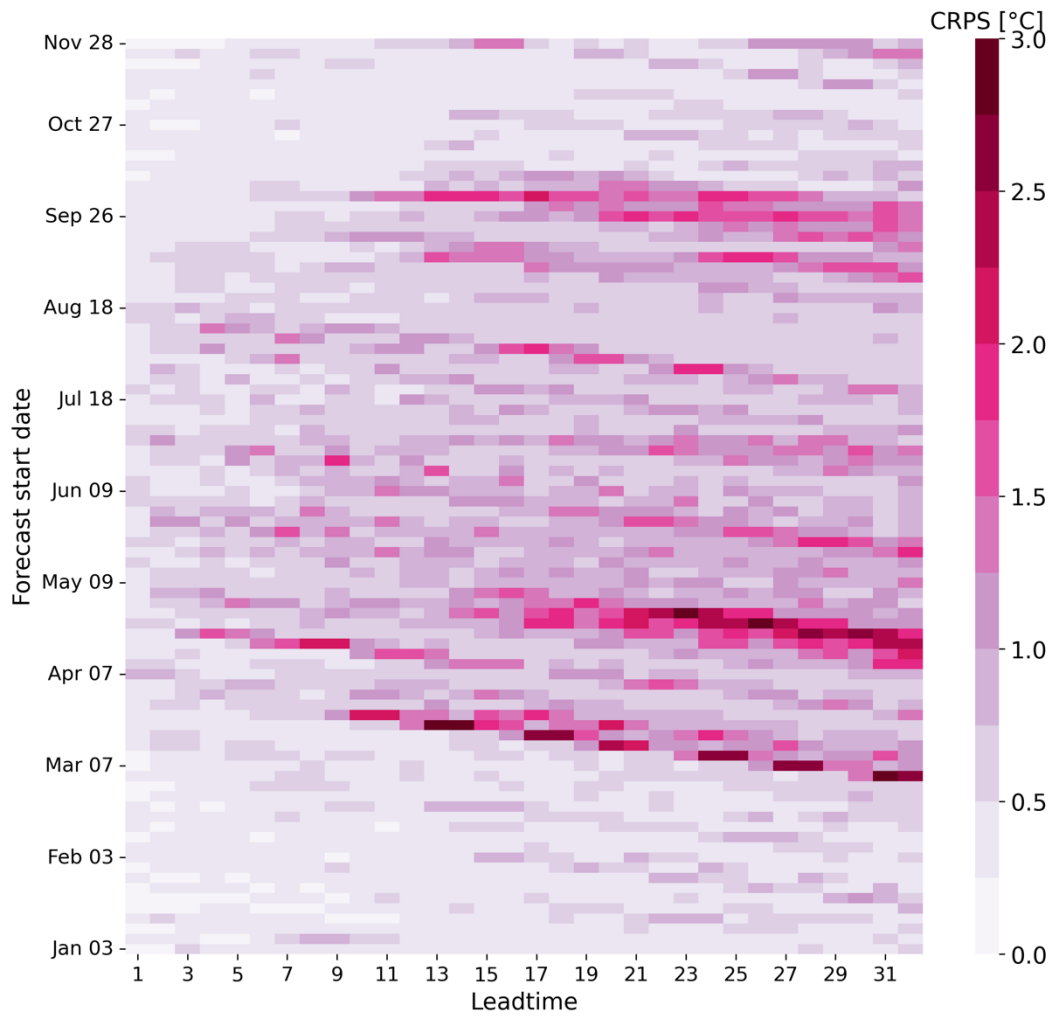

**Figure S8:** TFT predictive skill per lead time and forecast start date when including the uncertainty of meteorological forecasts. The CRPS is averaged over all stations.

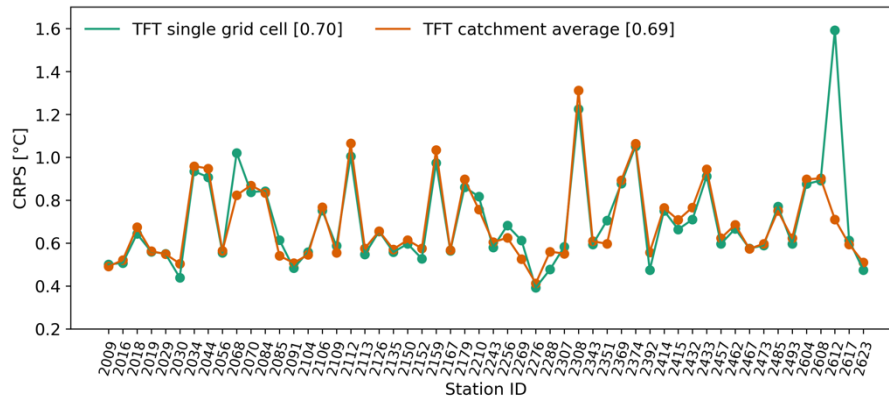

120 **Figure S9:** Comparison of TFT predictive skill per station if we use catchment average AT, P, and SD as predictors (orange) instead of their values at the single grid cell where the station is located as in Fig. 4 (green). Here we include the uncertainty of meteorological forecasts when estimating the predictive skill. The cumulative rank probability score (CRPS) is averaged over all lead times and forecasts. The legend indicates the average CRPS over all lead times, forecasts, and stations.

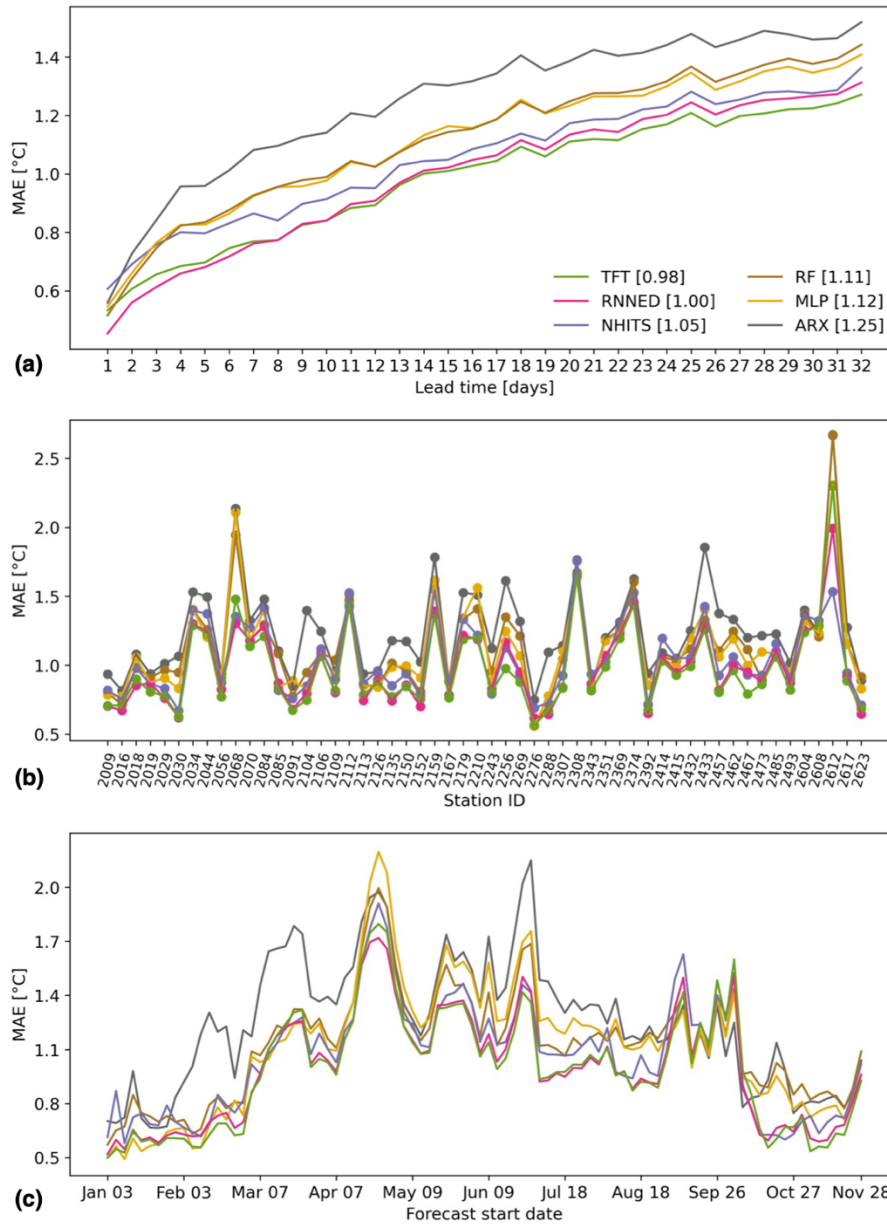

**Figure S10:** Model comparison of predictive skill when including the uncertainty of meteorological forecasts. The mean absolute error (MAE) of each model is shown as a function of (a) lead time averaged over all stations and forecasts, (b) station averaged over all lead times and forecasts, and (c) forecast start date averaged over all lead times and stations. The legend indicates the different models and their average MAE over all 32 lead times, 54 stations, and 90 forecasts distributed over the year 2022.



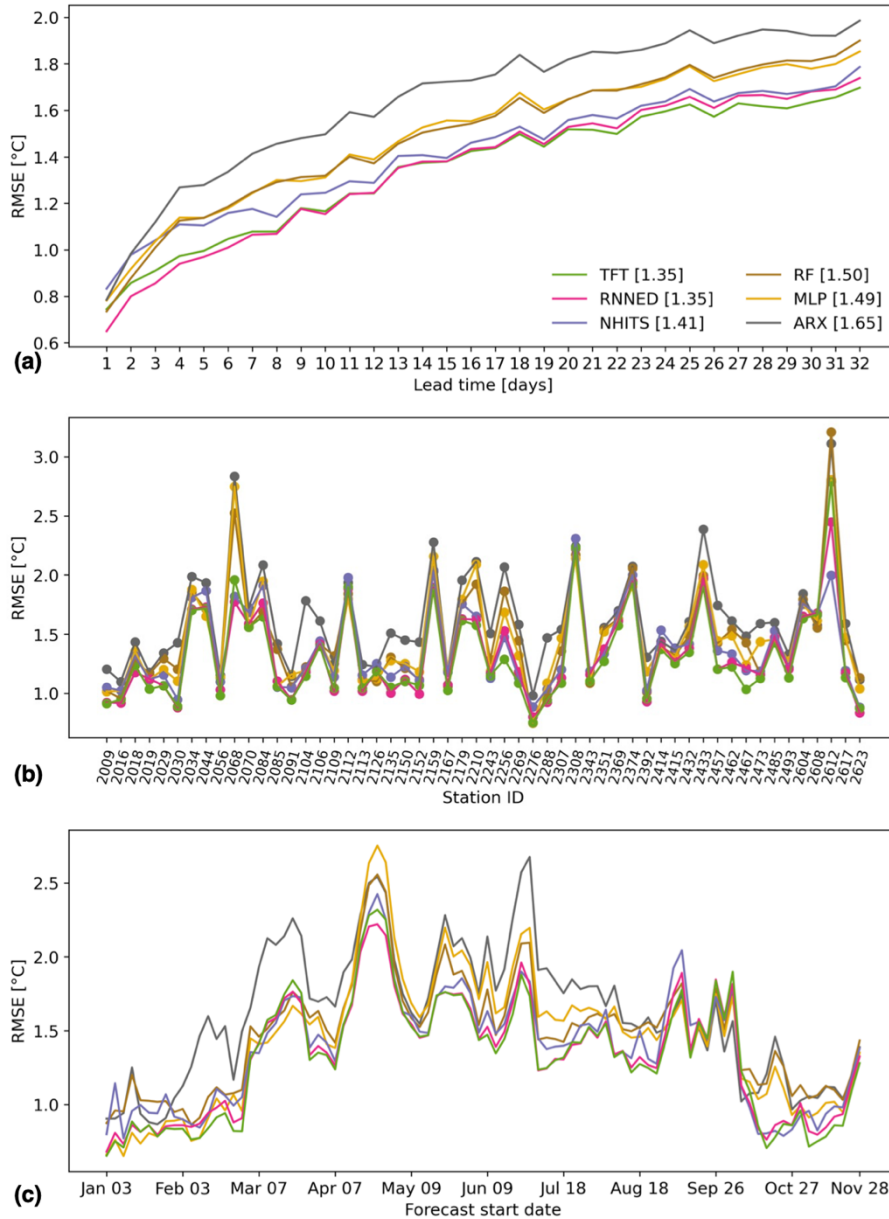

**Figure S11:** Model comparison of predictive skill when including the uncertainty of meteorological forecasts. The root mean squared error (RMSE) of each model is shown as a function of **(a)** lead time averaged over all stations and forecasts, **(b)** station averaged over all lead times and forecasts, and **(c)** forecast start date averaged over all lead times and stations. The legend indicates the different models and their average RMSE over all 32 lead times, 54 stations, and 90 forecasts distributed over the year 2022.

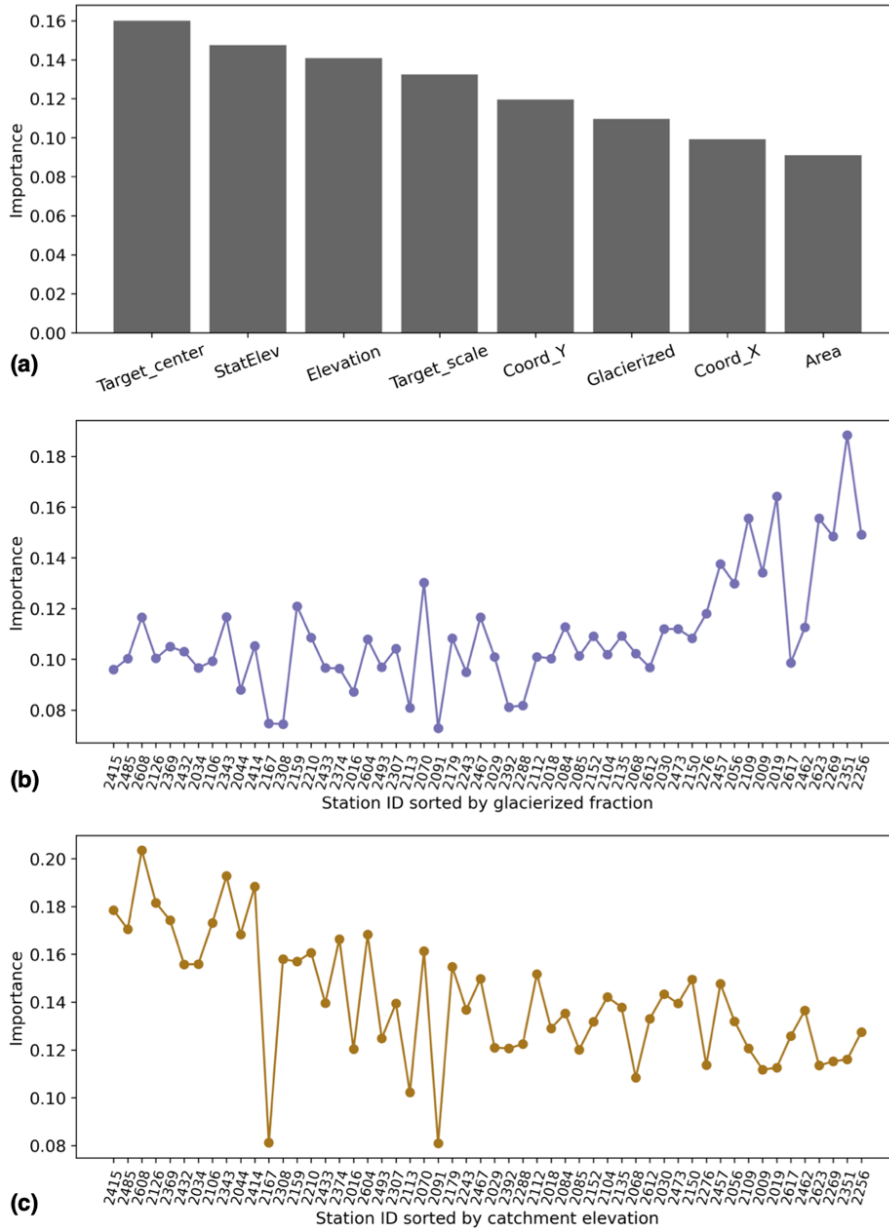

145 **Figure S12:** TFT static feature importance. **(a)** Feature importance averaged over 10 random seeds and 54 stations. **(b)** Glacierized fraction importance per station, with stations sorted according to the glacierized fraction of their catchments. **(c)** Catchment elevation importance per station, with stations sorted according to their mean catchment elevation.

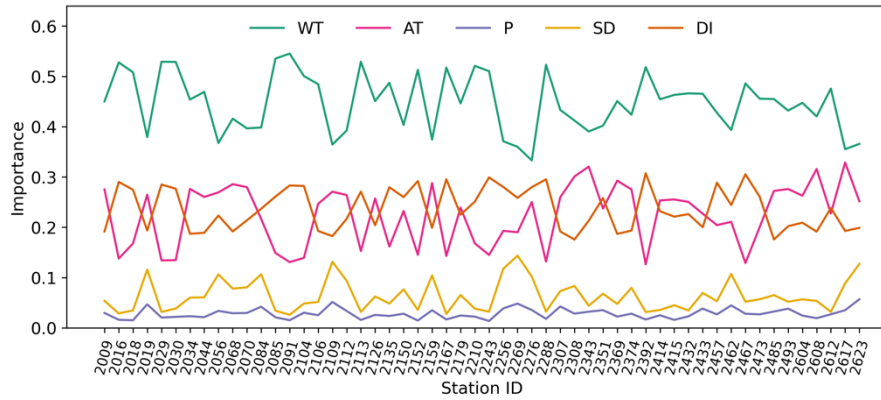

**Figure S13:** RF feature importance. The importance is deduced from the decrease in accuracy when randomly permuting the values of a feature. The larger the accuracy decrease, the higher the importance of the feature. Here the feature importance weights are obtained with the data from 2012 to 2021 used for training the RF model.

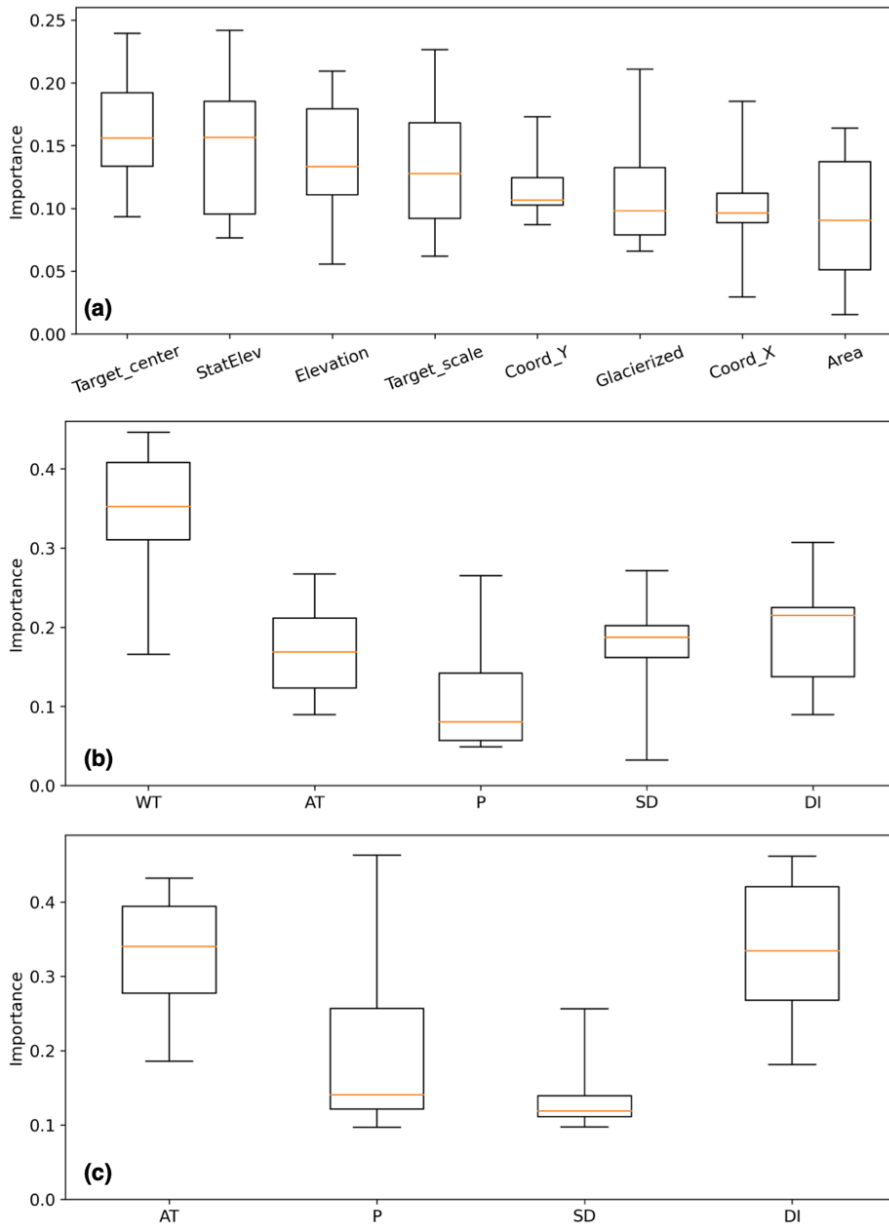

160

**Figure S14:** TFT average feature *importance* variability across 10 models trained with different random seeds. Results are shown for **(a)** static features, **(b)** encoder features, and **(c)** decoder features. Boxplots indicate the minimum, median, maximum, and interquartile range of the average *importance* across time steps, stations and forecast start dates.

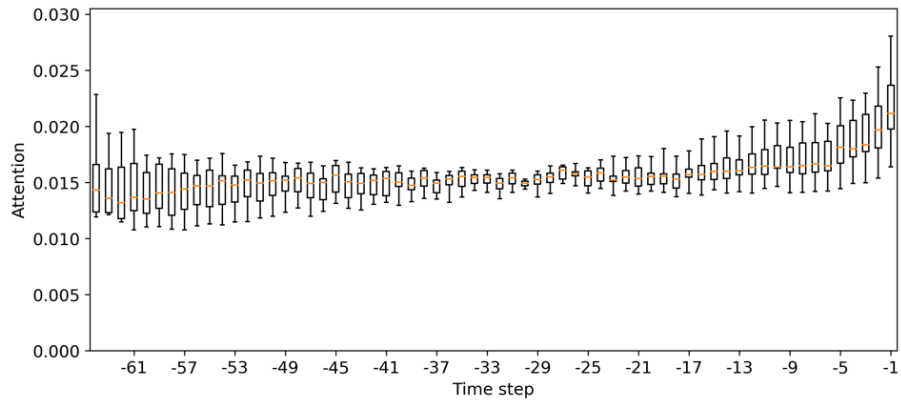

165 **Figure S15:** TFT *attention* variability across 10 models trained with different random seeds as a function of encoder time step. Boxplots indicate the minimum, median, maximum, and interquartile range of the average *attention* across stations and forecast start dates.
